# Supplementary material
Source: publisher figshare collection journal article supplement (https://acs.figshare.com/ndownloader/files/3850426)
Supplement: Supplementary file 1 [file 3850426]

*Supporting Information for*

# Fabrication of Gold Nanorods with Tunable Longitudinal Surface Plasmon Resonance Peaks by Reductive Dopamine

*Gaoxing Su,<sup>†,‡</sup> Chi Yang,<sup>\*,†</sup> Jun-Jie Zhu<sup>\*,‡</sup>*

<sup>†</sup>School of Pharmacy, Nantong University, Nantong 226001, China

<sup>‡</sup>State Key Lab of Analytical Chemistry for Life Science, School of Chemistry and Chemical Engineering, Nanjing University, Nanjing 210093, China

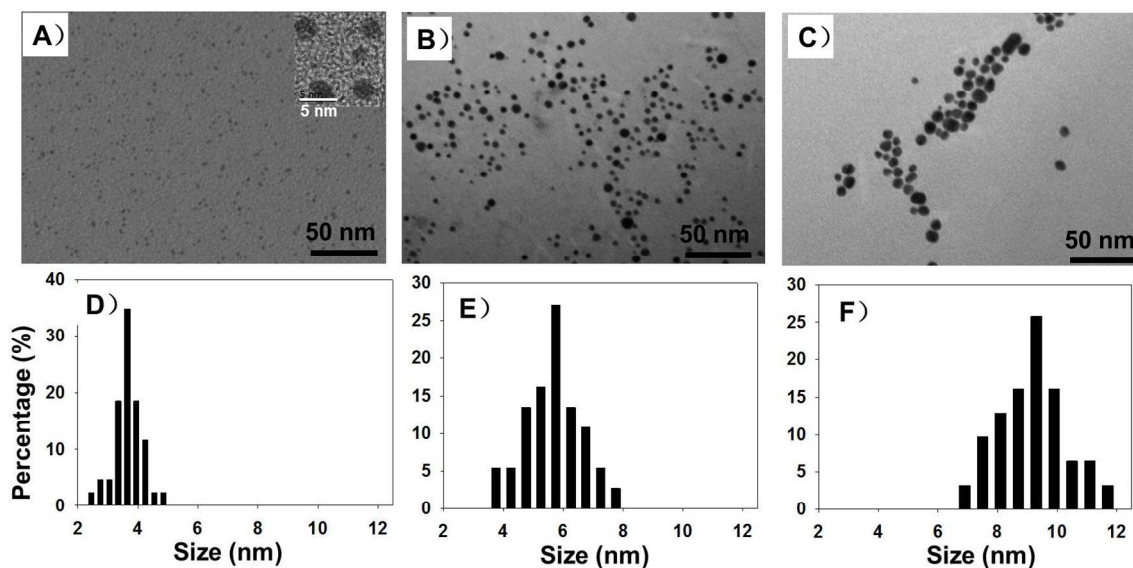

Figure S1. TEM images of gold seed A (A), B (B), and C (C); and the size distribution of gold seed A (D), B (E), and C (F) calculated from the corresponding TEM images.

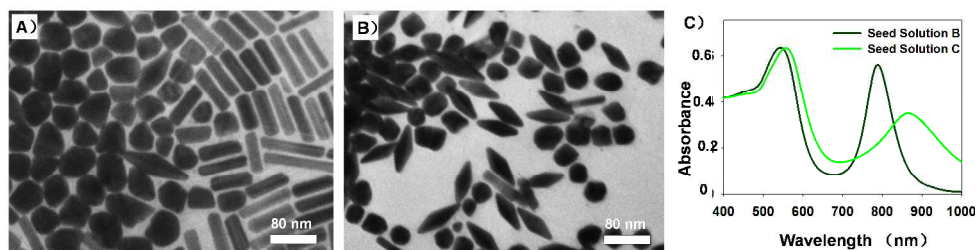

Figure S2. TEM images of the gold nanoparticles synthesized with seed solution B (A) and C (B); and their UV-vis-NIR absorption spectra (C).

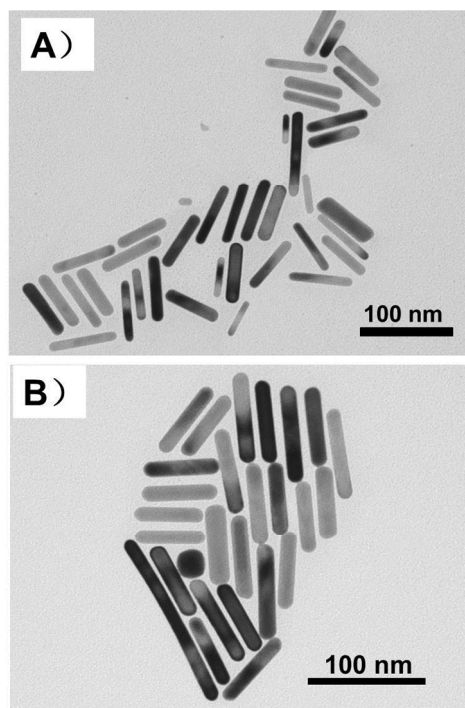

**Figure S3.** TEM images of the synthesized GNRs at 0.05 M (A) and 0.075 M (B) CTAB solution.  $\text{AgNO}_3$  (70  $\mu\text{L}$ , 0.1 M), Dopamine hydrochloride (20 mg in 0.5 mL water) and Seed solution A (160  $\mu\text{L}$ ) were used in preparation.

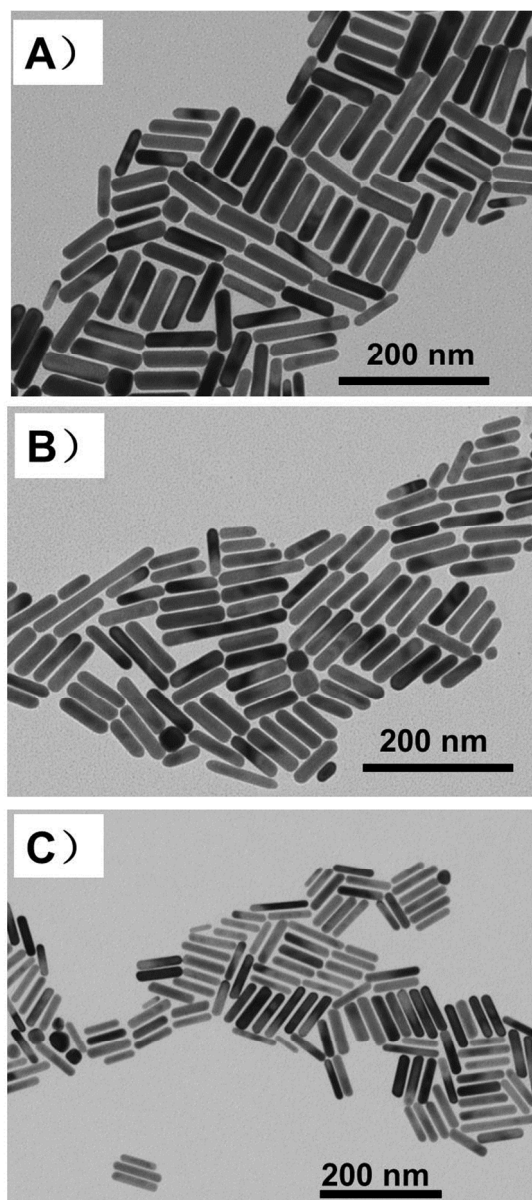

**Figure S4.** TEM images of GNRs prepared with 80  $\mu\text{L}$  (A), 120  $\mu\text{L}$  (B), and 200  $\mu\text{L}$  (C) seed solution A. Other preparation parameters:  $\text{AgNO}_3$  (70  $\mu\text{L}$ , 0.1 M), Dopamine hydrochloride (20 mg in 0.5 mL water), and  $[\text{CTAB}] = 0.1$  M.

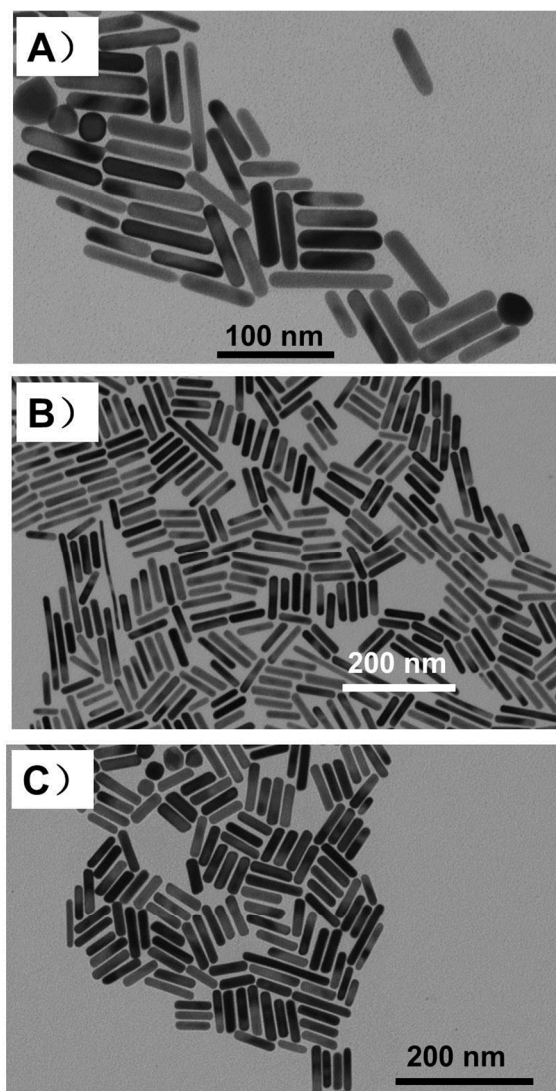

**Figure S5.** TEM images of GNRs prepared with 15 mg (A), 30 mg (A), and 40 mg (A) dopamine hydrochloride. Dopamine hydrochloride was dissolved in 0.5 mL water. Other preparation parameters:  $\text{AgNO}_3$  (70  $\mu\text{L}$ , 0.1 M), Seed solution A (160  $\mu\text{L}$ ), and  $[\text{CTAB}] = 0.1 \text{ M}$ .

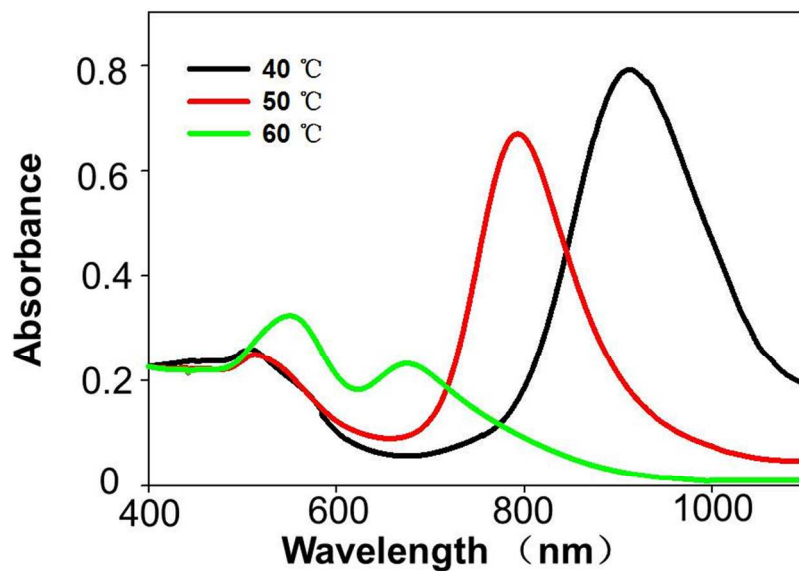

**Figure S6.** UV-vis-NIR absorption spectra of GNR prepared at 40, 50, and 60 °C. Other preparation parameters: AgNO<sub>3</sub> (70  $\mu$ L, 0.1 M), Dopamine hydrochloride (20 mg in 0.5 mL water), Seed solution A (160  $\mu$ L), and [CTAB] = 0.1 M.
